# Supplementary material
Source: Springer Nature journal article supplement (https://www.springermedizin.de/resource/supplementary/12943_2014_1347_MOESM6_ESM.pdf/9552788)
Supplement: MOESM6 [file 9552788]

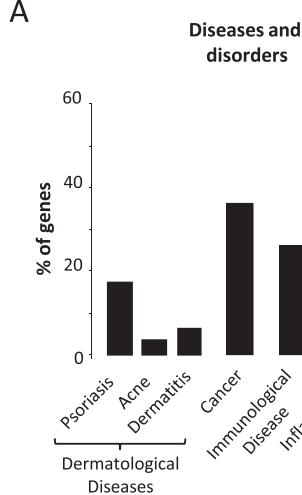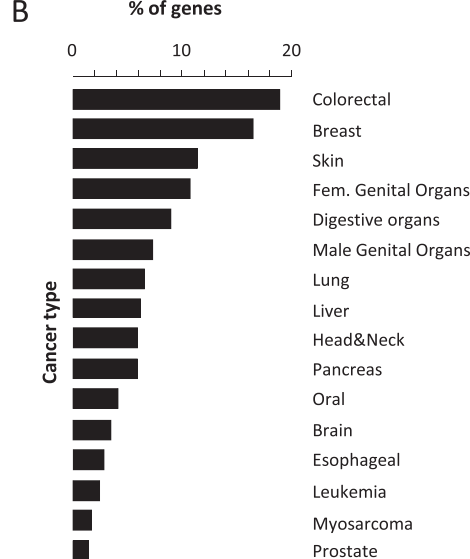

**C**

|                             | <b>Actinic Keratosis (1)<br/>Van Ruissen et al.</b> | <b>Actinic Keratosis (2)<br/>Ra et al.</b> | <b>Actinic Keratosis (3)<br/>Nindl et al.</b>                                | <b>Actinic Keratosis (4)<br/>Padilla et al.</b>                       | <b>Actinic Keratosis (5)<br/>Torres et al.</b>                                                                                                          | <b>Arsenic treated keratinocytes<br/>Dodmane et al.</b> |
|-----------------------------|-----------------------------------------------------|--------------------------------------------|------------------------------------------------------------------------------|-----------------------------------------------------------------------|---------------------------------------------------------------------------------------------------------------------------------------------------------|---------------------------------------------------------|
| <b>Up-regulated Genes</b>   | FABP5<br>S100A8<br>S100A9                           | GJB2<br>S100A8<br>SPRR1A<br>SPRR1B         | DEFB4A<br>DSC2<br>GBP1<br>MX1<br>PLBD1<br>RHCG<br>S100A9<br>SPRR1A<br>SPRR1B | AKR1B10<br>DSC2<br>GJB2<br>GJB6<br>KRT75<br>RHCG<br>S100A9<br>S100A12 | AKR1B10<br>CD47<br>DEFB4A<br>DSC2<br>IL1F9<br>KRT13<br>OAS1<br>RHCG<br>S100A8<br>S100A9<br>S100A12<br>SAA2<br>SERPINB13<br>SERPINE1<br>SPRR1A<br>SPRR1B | AKR1B10<br>AKR1C3<br>AKR1C2<br>CRYAB<br>KRT75<br>TAGLN  |
| <b>Down-regulated Genes</b> |                                                     |                                            |                                                                              | FHL-1                                                                 | FHL-1                                                                                                                                                   |                                                         |
